# Supplementary material for: Microfluidic tank assisted nicotine sensing property of field effect transistor composed of an atomically thin MoS2channel
Source: Royal Society of Chemistry journal article supplement (doi:10.1039/d0cp05710j), 2020-01-01
Supplement: d0cp05710j1.pdf [file d0cp05710j1.pdf]

## Supplementary Information

# Microfluidic Tank Assisted Nicotine Sensing Property of Field Effect Transistor Composed of Atomically Thin MoS<sub>2</sub> Channel

*Muhammad Shamim Al Mamun,<sup>a</sup> Yudai Tanaka,<sup>a</sup> Hiroki Waizumi,<sup>a</sup> Tsuyoshi Takaoka,<sup>b</sup>  
Zhipeng Wang,<sup>a</sup> Md Iftekharul Alam,<sup>a</sup> Atsushi Ando,<sup>c</sup> Mao Fukuyama,<sup>b</sup> Akihide Hibara,<sup>b</sup> Tadahiyo  
Komeda<sup>b</sup>*

<sup>a</sup> Department of Chemistry, Graduate School of Science, Tohoku University, Aramaki-  
Aza-Aoba, Aoba-Ku, Sendai 9808578, Japan

<sup>b</sup> Institute of Multidisciplinary Research for Advanced Materials (IMRAM, Tagen),  
Tohoku University, 2-1-1, Katahira, Aoba-Ku, Sendai 9800877, Japan

<sup>c</sup> National Institute of Advanced Industrial Science and Technology, 1-1-1 Umezono,  
Tsukuba, Ibaraki 305-8568, Japan

[komeda@tagen.tohoku.ac.jp](mailto:komeda@tagen.tohoku.ac.jp)

Table of contents

- 1 Device Fabrication Process
  - 2 Contrast method for the flake thickness measurement
  - 3 Scheme of band diagram and Fermi level shift
-

## 1. Device fabrication process

The substrate (300 nm SiO<sub>2</sub>/p<sup>++</sup>Si) was cleaned by acetone and isopropanol separately through ultra-sonication bath for 5 min. Then it was dried by the N<sub>2</sub> gun and then the substrate was treated under UV-O<sub>3</sub> treatment for 30 min to remove any organic impurities. The MoS<sub>2</sub> flakes were transferred to substrate by the mechanically exfoliated technique. The flake was covered by the MMA (methyl methacrylate) and poly (methyl methacrylate) (PMMA A2) resist. Then electron beam lithography (ELS-700, ELIONIX) was carried out for making the electrode pattern. After developing by the developer solvent, Ti (10 nm) /Au (150 nm) source and drain contacts were formed by EB evaporator. Finally, lift-off was done through wet removal by N-methyl-2-pyrrolidone (NMP)

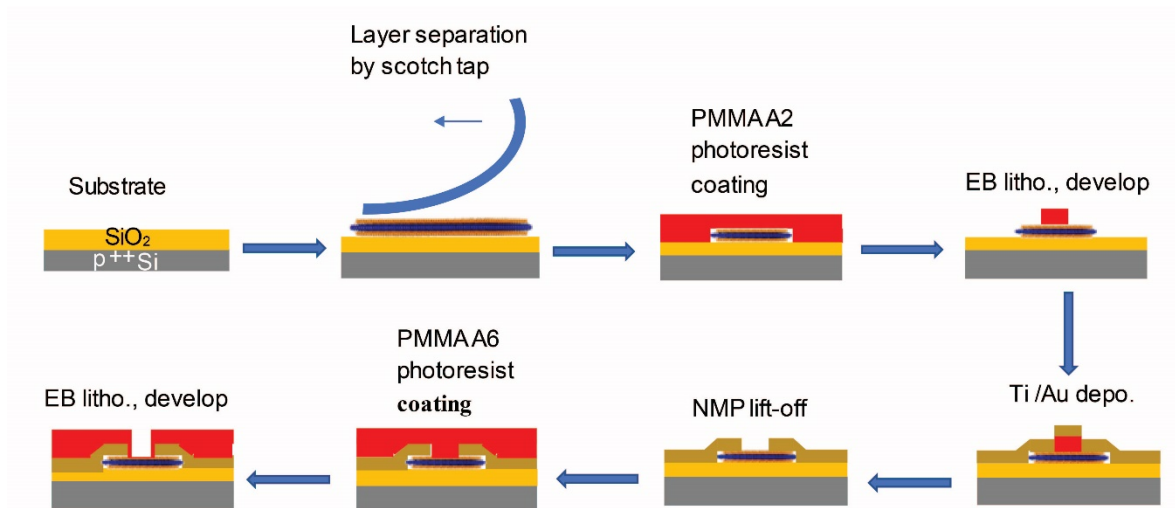

**Figure S1.** Schematic illustration of the MoS<sub>2</sub>-FET fabrication process.

## 2. Contrast method for the flake thickness measurement

It is possible to estimate the thickness of the MoS<sub>2</sub> layer by measuring the contrast of the reflected light from the SiO<sub>2</sub> surface with and without the presence of the MoS<sub>2</sub> flake.<sup>1</sup> The contrast is defined with the following equation:

$$C(\lambda) = \frac{R_0(\lambda) - R(\lambda)}{R_0(\lambda)}$$

where  $R_0(\lambda)$  and  $R(\lambda)$  are the intensities of the reflected light without and with MoS<sub>2</sub> for the wavelength of  $\lambda$ , respectively. It was suggested that the use of  $\lambda$  in the red region is more efficient compare to the use of the blue and green lights.<sup>1</sup> For the device used in this report, the  $C(\lambda)$  of the red light was found to be 0.5, which indicates the number of the layers of the flake to be four from the table calibrated previously.<sup>1</sup> The optical microscope image of the device is shown in main text Fig. 1a.

### 3. Scheme of band diagram and fermi level shift

The energy band diagram between pristine MoS<sub>2</sub> and the nicotine, and the direction of electron transfer induced by the nicotine functionalization is shown. Figure S2 (a) shows that Fermi level of the nicotine may be higher than that of the MoS<sub>2</sub> thus can donate electron to the fermi level of MoS<sub>2</sub>, similar with the Chen et al. Figure S2 (b) represents the work function ( $\Phi$ ) decreases after nicotine doping. The valence band maximum (VBM) goes above the fermi level ( $E_F$ ) for pristine MoS<sub>2</sub> after nicotine incorporation indicating the n-type doping of MoS<sub>2</sub>.<sup>2</sup> Electron affinity ( $\chi$ ) may increase a little after electron donation from the nicotine to the pristine MoS<sub>2</sub>. Here  $E$  is defined for the energy gap between the conduction band ( $E_C$ ) and valance band ( $E_V$ ).

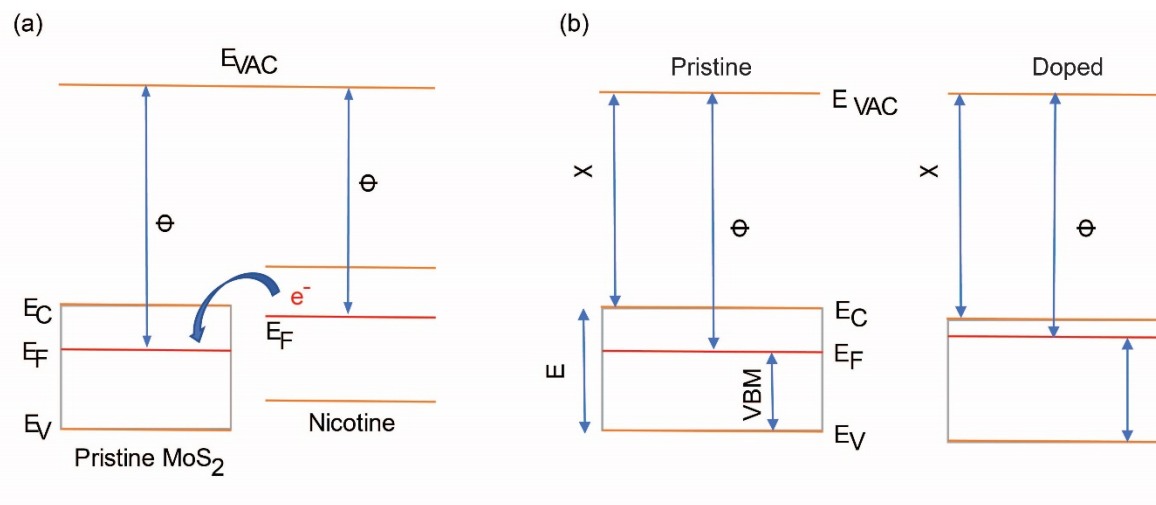

**Figure S2.** (a) Illustration of electron transfer from nicotine to MoS<sub>2</sub>, (b) Energy diagram showing the fermi level changes of MoS<sub>2</sub> after nicotine doping.

1. Y. Y. Wang, R. X. Gao, Z. H. Ni, H. He, S. P. Guo, H. P. Yang, C. X. Cong and T. Yu, *Nanotechnology*, 2012, **23**, 495713.
2. A. Azcatl, X. Qin, A. Prakash, C. Zhang, L. Cheng, Q. Wang, N. Lu, M. J. Kim, J. Kim, K. Cho, R. Addou, C. L. Hinkle, J. Appenzeller and R. M. Wallace, *Nano Lett*, 2016, **16**, 5437-5443.
